# Supplementary material for: Reduced Fecal Calprotectin and Inflammation in a Murine Model of Atopic Dermatitis Following Probiotic Treatment
Source: MDPI journal article supplement (doi:10.3390/ijms21113968), 2020-05-31
Supplement: s1 [file s1]

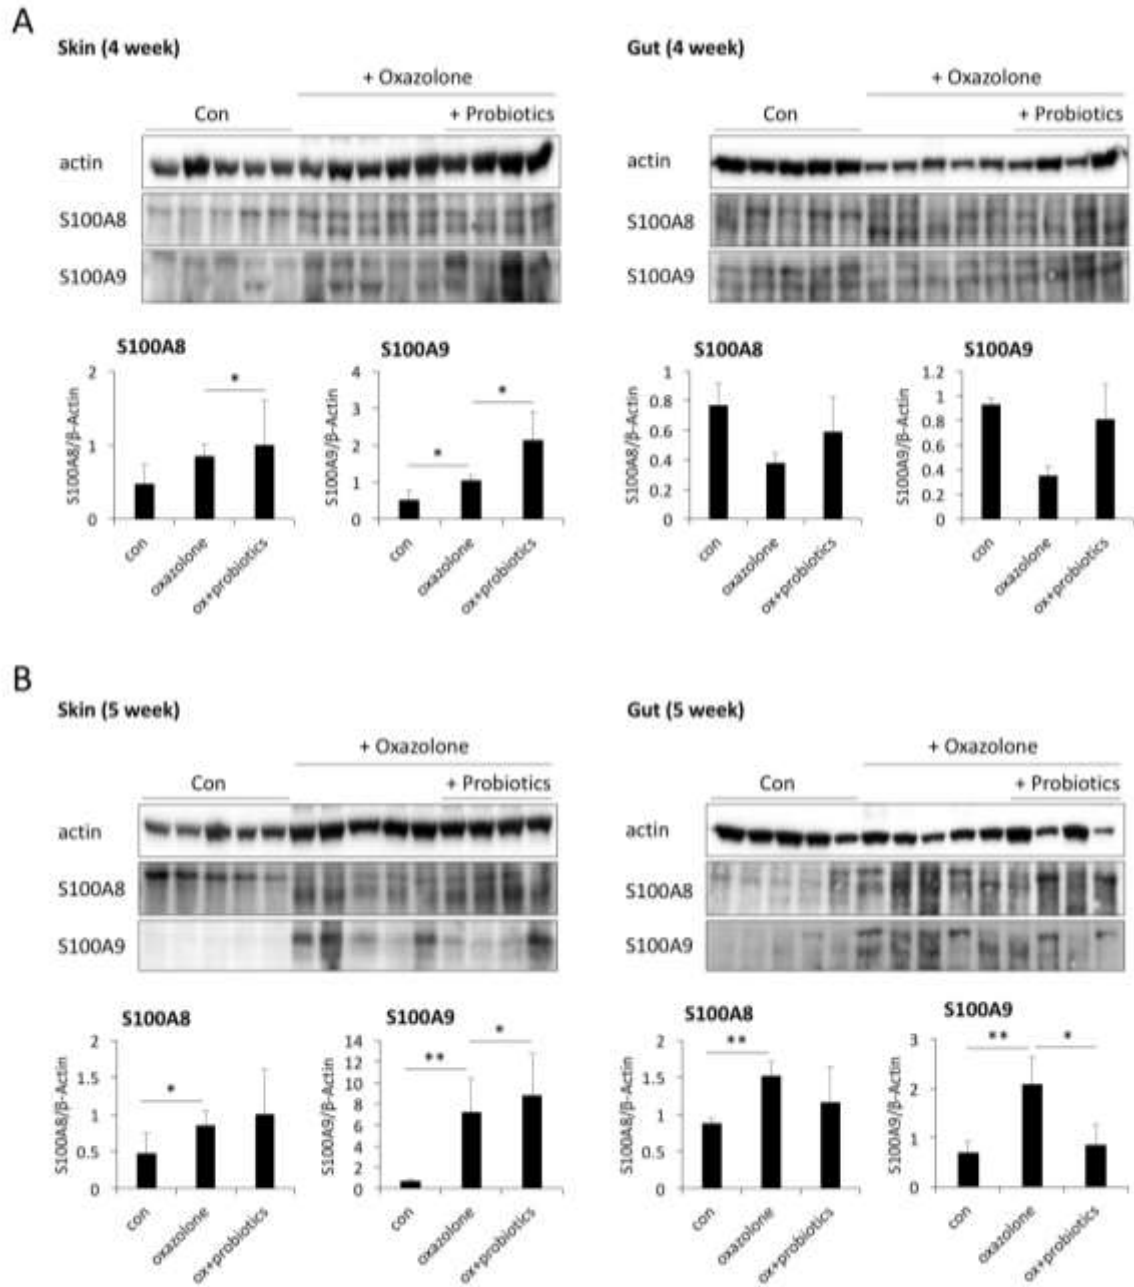

**Figure S1.** Effects of probiotics on the temporal protein expression of calprotectin in the skin and guts of Ox-induced AD mice. **(A)** Protein levels of calprotectin (S100a8 and S100a9) in the skin and guts of AD mice treated with probiotics for 1 week (from Week 3 to 4) in parallel with the sensitization with 0.1% Ox. Bars indicate the means  $\pm$  SD. \* $p < 0.05$ . **(B)** Protein levels of calprotectin in the skin and guts of AD mice treated with probiotics for 2 weeks (from Week 3 to 5) in parallel with the sensitization with 0.1% Ox. Data pooled from two independent experiments are presented as the mean  $\pm$  SD. \* $p < 0.05$ , \*\* $p < 0.01$ .
